# Supplementary material for: Nutrient content and stoichiometry of pelagic Sargassum reflects increasing nitrogen availability in the Atlantic Basin
Source: PubMed Central journal article supplement (PMC8144625; doi:10.1038/s41467-021-23135-7), 2021-05-24
Supplement: 41467_2021_23135_MOESM1_ESM.pdf [file 41467_2021_23135_MOESM1_ESM.pdf]

## Supplementary Information

Nutrient content and stoichiometry of pelagic *Sargassum* reflects increasing nitrogen availability in the Atlantic Basin

B. E. Lapointe<sup>\*1</sup>, R. A. Brewton<sup>1</sup>, L. W. Herren<sup>1</sup>, M. Wang<sup>2</sup>, C. Hu<sup>2</sup>, D.J. McGillicuddy, Jr.<sup>3</sup>, S. Lindell<sup>3</sup>, F. J. Hernandez<sup>4</sup>, P. L. Morton<sup>5</sup>

<sup>1</sup>Harbor Branch Oceanographic Institute, Florida Atlantic University, 5600 US 1 North, Fort Pierce, FL 34946

<sup>2</sup>University of South Florida, 140 Seventh Ave. South, St. Petersburg, FL 33701

<sup>3</sup>Woods Hole Oceanographic Institution, 86 Water St., Woods Hole, MA 02543

<sup>4</sup>Division of Coastal Sciences, University of Southern Mississippi, 703 East Beach Drive, Ocean Springs, MS, USA 39564

<sup>5</sup>Florida State University/National High Magnetic Field Lab, 1800 E. Paul Dirac Drive, Tallahassee, Florida 32310

\*Corresponding author: Brian Lapointe, blapoin1@fau.edu

## Supplemental Results

### Changes in *Sargassum* tissue chemistry

*Sargassum* tissue chemistry was statistically similar between *S. fluitans* and *S. natans* for the entire NA dataset. Specifically, *S. fluitans* and *S. natans* had similar elemental composition (MANOVA, Pillai's lambda = 0.006,  $F =_{3, 470} 1.01$ ,  $P = 0.388$ ; Supplementary Table 1) and C:N:P molar ratios (MANOVA, Pillai's lambda = 0.005,  $F =_{3, 470} 0.792$ ,  $P = 0.499$ ; Supplementary Table 2). For elemental composition, the interactions between species, decade, and season were not significant (Supplementary Table 1). The overall mean values for %C, %N and %P were  $28.0 \pm 0.15$ ,  $1.18 \pm 0.02$ , and  $0.11 \pm 0.003$  (all  $n = 488$ ). The overall mean molar C:N, C:P, and N:P ratios were  $32.7 \pm 0.71$ ,  $853 \pm 23$ , and  $26.6 \pm 0.48$  (all  $n = 488$ ). For the multivariate analyses of C:N:P ratios, there was a significant 2-way interaction between species and season (MANOVA, Pillai's lambda = 0.074,  $F =_{9, 1416} 3.96$ ,  $P < 0.001$ ) and 3-way interaction between decade, species, and season (MANOVA, Pillai's lambda = 0.0677,  $F =_{9, 1416} 3.63$ ,  $P < 0.001$ ). The subsequent univariate ANOVAs did not identify any of the C:N:P ratios to be significant for these interactions (all  $P > 0.05$ ; Supplementary Table 2). For nutrient ratios, there was a multivariate interaction between decade and season (MANOVA, Pillai's lambda = 0.439,  $F =_{9, 1416} 2.34$ ,  $P = 0.013$ ; Supplementary Table 2), however none of the univariate ANOVAs were significant (all  $P > 0.05$ ; Supplementary Table 2).

**Supplementary Table 1: *Sargassum* elemental composition MANOVA Table.**

Multivariate analysis of variance (MANOVA) table of tissue elemental composition (%C, %N, %P) from *Sargassum natans* and *S. fluitans* collected throughout the North Atlantic Ocean. Factors included were by decade (1980s vs 2010s), species (*S. natans* vs. *S. fluitans*), Northern Hemisphere meteorological season (winter, spring, summer, and fall), and all interaction effects. Subsequent univariate analysis of variance (ANOVA) are shown for significant factors. Significant (<0.05) *P* values are bold.

| Test / Factor (s)         | SS    | df      | <i>F</i> | <i>P</i>         |
|---------------------------|-------|---------|----------|------------------|
| <b>MANOVA</b>             |       |         |          |                  |
| Decade                    | -     | 3, 470  | 39.4     | <b>&lt;0.001</b> |
| Species                   | -     | 3, 470  | 1.01     | 0.388            |
| Season                    | -     | 9, 1416 | 8.13     | <b>&lt;0.001</b> |
| Decade * Species          | -     | 3, 470  | 1.32     | 0.266            |
| Species * Season          | -     | 9, 1416 | 0.51     | 0.871            |
| Decade * Season           | -     | 9, 1416 | 2.95     | <b>0.002</b>     |
| Decade * Species * Season | -     | 9, 1416 | 0.51     | 0.976            |
| <b>ANOVA %C</b>           |       |         |          |                  |
| Decade                    | 440   | 1       | 53.8     | <b>&lt;0.001</b> |
| Season                    | 63.3  | 3       | 2.58     | 0.053            |
| Decade * Season           | 46.5  | 3       | 1.90     | 0.129            |
| <b>ANOVA %N</b>           |       |         |          |                  |
| Decade                    | 0.118 | 1       | 5.01     | <b>0.026</b>     |
| Season                    | 1.20  | 3       | 17.1     | <b>&lt;0.001</b> |
| Decade * Season           | 0.212 | 3       | 3.00     | <b>0.030</b>     |
| <b>ANOVA %P</b>           |       |         |          |                  |
| Decade                    | 1.10  | 1       | 31.4     | <b>&lt;0.001</b> |
| Season                    | 1.76  | 3       | 16.7     | <b>&lt;0.001</b> |
| Decade * Season           | 0.410 | 3       | 3.91     | <b>0.009</b>     |

**Supplementary Table 2: *Sargassum* tissue nutrient stoichiometry MANOVA table.**

Multivariate analysis of variance (MANOVA) table of tissue nutrient stoichiometry (C:N, N:P, C:P) from *Sargassum natans* and *S. fluitans* collected throughout the North Atlantic Ocean. Factors included were by decade (1980s vs 2010s), species (*S. natans* vs. *S. fluitans*), Northern Hemisphere meteorological season (winter, spring, summer, and fall), and all interaction effects. Subsequent univariate analysis of variance (ANOVA) are shown for significant factors. Significant (<0.05) *P* values are bold.

| Test / Factor(s)          | SS    | df      | <i>F</i> | <i>P</i>         |
|---------------------------|-------|---------|----------|------------------|
| <b>MANOVA</b>             |       |         |          |                  |
| Decade                    | -     | 3, 470  | 48.4     | <b>&lt;0.001</b> |
| Species                   | -     | 3, 470  | 0.792    | 0.499            |
| Season                    | -     | 9, 1416 | 6.25     | <b>&lt;0.001</b> |
| Decade * Species          | -     | 3, 470  | 0.294    | 0.830            |
| Species * Season          | -     | 9, 1416 | 3.96     | <b>&lt;0.001</b> |
| Decade * Season           | -     | 9, 1416 | 2.34     | <b>0.013</b>     |
| Decade * Species * Season | -     | 9, 1416 | 3.63     | <b>&lt;0.001</b> |
| <b>ANOVA C:N</b>          |       |         |          |                  |
| Decade                    | 1.97  | 1       | <0.001   | 0.956            |
| Season                    | 1.12  | 3       | 13.4     | <b>&lt;0.001</b> |
| Species * Season          | 0.072 | 3       | 0.860    | 0.463            |
| Decade * Season           | 0.134 | 3       | 1.61     | 0.186            |
| Decade * Species * Season | 0.018 | 3       | 0.210    | 0.890            |
| <b>ANOVA N:P</b>          |       |         |          |                  |
| Decade                    | 1.92  | 1       | 93.4     | <b>&lt;0.001</b> |
| Season                    | 0.06  | 3       | 0.930    | 0.427            |
| Species * Season          | 0.013 | 3       | 0.210    | 0.890            |
| Decade * Season           | 0.049 | 3       | 0.800    | 0.493            |
| Decade * Species * Season | 0.005 | 3       | 0.080    | 0.973            |
| <b>ANOVA C:P</b>          |       |         |          |                  |
| Decade                    | 1.97  | 1       | 44.9     | <b>&lt;0.001</b> |
| Season                    | 1.65  | 3       | 12.5     | <b>&lt;0.001</b> |
| Species * Season          | 0.097 | 3       | 0.740    | 0.528            |
| Decade * Season           | 0.284 | 3       | 2.16     | 0.092            |
| Decade * Species * Season | 0.008 | 3       | 0.060    | 0.981            |

**Supplementary Table 3. *Sargassum* tissue nutrient contents by decade and location.**

Tissue nutrient contents (mean  $\pm$  SE) of *Sargassum natans* and *S. fluitans* collected throughout the North Atlantic Ocean showing the stable N ( $\delta^{15}\text{N}$ ) isotope values, elemental composition (%C, %N, %P), and stoichiometry (C:N:P) by decade and location.

| Decade              | Ocean Basin       | Site               | n                | $\delta^{15}\text{N}$ (‰)         | %C                                | %N                                | %P                                 | C:N                               | C:P                            | N:P                              |                |
|---------------------|-------------------|--------------------|------------------|-----------------------------------|-----------------------------------|-----------------------------------|------------------------------------|-----------------------------------|--------------------------------|----------------------------------|----------------|
| 1980s               | North Atlantic    |                    | 41               |                                   | 23.1 $\pm$ 0.59                   | 0.89 $\pm$ 0.06                   | 0.18 $\pm$ 0.017                   | 36.1 $\pm$ 2.92                   | 497 $\pm$ 54                   | 13.2 $\pm$ 0.8                   |                |
|                     |                   |                    | 39               |                                   | 23.3 $\pm$ 0.60                   | 0.90 $\pm$ 0.06                   | 0.18 $\pm$ 0.018                   | 36.4 $\pm$ 3.06                   | 506 $\pm$ 56                   | 13.3 $\pm$ 0.8                   |                |
|                     |                   | Looe Key           | 10               |                                   | 25.8 $\pm$ 0.49                   | 1.09 $\pm$ 0.16                   | 0.24 $\pm$ 0.041                   | 34.6 $\pm$ 5.79                   | 402 $\pm$ 89                   | 11.2 $\pm$ 1.2                   |                |
|                     |                   | Neritic Baseline   | 14               |                                   | 22.8 $\pm$ 0.77                   | 1.05 $\pm$ 0.07                   | 0.24 $\pm$ 0.019                   | 26.6 $\pm$ 1.80                   | 264 $\pm$ 26                   | 9.8 $\pm$ 0.5                    |                |
|                     |                   | Oceanic Baseline   | 15               |                                   | 22.1 $\pm$ 1.23                   | 0.65 $\pm$ 0.07                   | 0.08 $\pm$ 0.010                   | 46.7 $\pm$ 5.90                   | 802 $\pm$ 87                   | 18.0 $\pm$ 1.1                   |                |
| 2010s               | Western Caribbean | Neritic Baseline   | 2                |                                   | 18.8 $\pm$ 0.35                   | 0.72 $\pm$ 0.01                   | 0.16 $\pm$ 0.005                   | 30.0 $\pm$ 1.00                   | 311 $\pm$ 5                    | 10.4 $\pm$ 0.4                   |                |
| 2010s               | Eastern Caribbean |                    | 447              | 1.55 $\pm$ 0.12                   | 28.5 $\pm$ 0.14                   | 1.21 $\pm$ 0.02                   | 0.10 $\pm$ 0.002                   | 32.4 $\pm$ 0.72                   | 886 $\pm$ 24                   | 27.8 $\pm$ 0.5                   |                |
|                     |                   |                    | 10               | -0.24 $\pm$ 0.24                  | 27.4 $\pm$ 0.79                   | 0.97 $\pm$ 0.08                   | 0.12 $\pm$ 0.012                   | 35.6 $\pm$ 3.69                   | 676 $\pm$ 128                  | 19.5 $\pm$ 2.5                   |                |
| 2010s               | Barbados          |                    | 4                | 0.41 $\pm$ 0.22                   | 29.1 $\pm$ 0.27                   | 0.74 $\pm$ 0.03                   | 0.13 $\pm$ 0.021                   | 46.2 $\pm$ 1.76                   | 595 $\pm$ 76                   | 13.0 $\pm$ 1.8                   |                |
|                     |                   | Saba               | 1                | -1.83                             | 31.6                              | 0.78                              | 0.05                               | 47.2                              | 1787                           | 38.0                             |                |
|                     |                   | St. Thomas         | 5                | -0.43 $\pm$ 0.14                  | 25.1 $\pm$ 0.26                   | 1.20 $\pm$ 0.06                   | 0.13 $\pm$ 0.006                   | 24.9 $\pm$ 1.36                   | 518 $\pm$ 23                   | 20.9 $\pm$ 0.7                   |                |
|                     |                   |                    | 1                |                                   |                                   |                                   |                                    |                                   |                                |                                  |                |
|                     | Gulf of Mexico    |                    |                  | 264                               | 2.05 $\pm$ 0.18                   | 28.6 $\pm$ 0.19                   | 1.19 $\pm$ 0.03                    | 0.10 $\pm$ 0.003                  | 33.1 $\pm$ 0.92                | 944 $\pm$ 31                     | 29.1 $\pm$ 0.6 |
|                     |                   | GOM-AL-SUM         | 14               | 0.87 $\pm$ 0.11                   | 26.1 $\pm$ 0.51                   | 1.17 $\pm$ 0.10                   | 0.09 $\pm$ 0.008                   | 29.1 $\pm$ 2.86                   | 846 $\pm$ 86                   | 29.4 $\pm$ 1.1                   |                |
|                     |                   | GOM-FE             | 33               | -0.05 $\pm$ 0.10                  | 30.1 $\pm$ 0.18                   | 1.16 $\pm$ 0.04                   | 0.08 $\pm$ 0.004                   | 31.9 $\pm$ 1.18                   | 1026 $\pm$ 49                  | 32.3 $\pm$ 1.1                   |                |
|                     |                   | GOM-FL-SUM         | 3                | 5.47 $\pm$ 0.20                   | 24.5 $\pm$ 0.18                   | 2.55 $\pm$ 0.15                   | 0.21 $\pm$ 0.003                   | 11.3 $\pm$ 0.76                   | 297 $\pm$ 5                    | 26.4 $\pm$ 1.5                   |                |
|                     |                   | GOM-LA-FALL        | 20               |                                   | 33.4 $\pm$ 0.45                   | 0.79 $\pm$ 0.07                   | 0.06 $\pm$ 0.006                   | 57.0 $\pm$ 4.87                   | 1823 $\pm$ 197                 | 31.2 $\pm$ 1.5                   |                |
|                     |                   | GOM-LA-SUM         | 94               | 1.01 $\pm$ 0.13                   | 27.7 $\pm$ 0.18                   | 1.01 $\pm$ 0.03                   | 0.09 $\pm$ 0.002                   | 35.4 $\pm$ 1.20                   | 884 $\pm$ 29                   | 26.4 $\pm$ 0.9                   |                |
|                     |                   | GOM-SHELF-SUM      | 40               | -0.23 $\pm$ 0.08                  | 26.4 $\pm$ 0.29                   | 1.13 $\pm$ 0.03                   | 0.10 $\pm$ 0.004                   | 28.5 $\pm$ 1.12                   | 762 $\pm$ 52                   | 26.2 $\pm$ 0.9                   |                |
|                     |                   | GOM-TX-SPR         | 18               | 7.20 $\pm$ 0.27                   | 27.2 $\pm$ 0.71                   | 1.75 $\pm$ 0.07                   | 0.16 $\pm$ 0.013                   | 18.5 $\pm$ 0.82                   | 491 $\pm$ 46                   | 25.9 $\pm$ 1.6                   |                |
|                     |                   | GOM-TX-SUM         | 24               | 5.01 $\pm$ 0.27                   | 30.6 $\pm$ 1.12                   | 0.99 $\pm$ 0.09                   | 0.07 $\pm$ 0.005                   | 42.6 $\pm$ 3.58                   | 1306 $\pm$ 94                  | 33.0 $\pm$ 2.2                   |                |
|                     |                   | GOM-TX-WIN         | 18               | 7.59 $\pm$ 0.19                   | 30.8 $\pm$ 0.41                   | 2.28 $\pm$ 0.10                   | 0.15 $\pm$ 0.018                   | 16.4 $\pm$ 0.78                   | 686 $\pm$ 91                   | 39.6 $\pm$ 3.5                   |                |
|                     | North Atlantic    |                    |                  | 163                               | 1.02 $\pm$ 0.12                   | 28.3 $\pm$ 0.18                   | 1.27 $\pm$ 0.03                    | 0.12 $\pm$ 0.004                  | 29.7 $\pm$ 1.00                | 768 $\pm$ 37                     | 26.1 $\pm$ 0.9 |
|                     |                   | Abacos             | 6                | -1.28 $\pm$ 0.21                  | 26.5 $\pm$ 1.12                   | 1.17 $\pm$ 0.05                   | 0.10 $\pm$ 0.006                   | 26.7 $\pm$ 1.28                   | 716 $\pm$ 18                   | 27.2 $\pm$ 1.5                   |                |
|                     |                   | Amazon River Plume | 6                | 0.91 $\pm$ 0.83                   | 29.1 $\pm$ 0.65                   | 1.25 $\pm$ 0.38                   | 0.11 $\pm$ 0.026                   | 39.8 $\pm$ 8.48                   | 823 $\pm$ 148                  | 22.6 $\pm$ 2.3                   |                |
| Biscayne_GS         |                   | 4                  | -0.63 $\pm$ 0.10 | 30.4 $\pm$ 0.46                   | 0.89 $\pm$ 0.03                   | 0.09 $\pm$ 0.002                  | 40.2 $\pm$ 1.44                    | 856 $\pm$ 27                      | 21.4 $\pm$ 0.8                 |                                  |                |
| Fort Pierce_GS      |                   | 5                  | -0.44 $\pm$ 0.11 | 28.2 $\pm$ 0.49                   | 1.11 $\pm$ 0.14                   | 0.10 $\pm$ 0.012                  | 31.8 $\pm$ 4.18                    | 737 $\pm$ 85                      | 23.4 $\pm$ 0.8                 |                                  |                |
| Fort Pierce_NS      |                   | 15                 | 2.78 $\pm$ 0.24  | 28.1 $\pm$ 0.42                   | 1.42 $\pm$ 0.05                   | 0.14 $\pm$ 0.004                  | 23.5 $\pm$ 0.73                    | 526 $\pm$ 20                      | 22.7 $\pm$ 1.1                 |                                  |                |
| Islamorada_GS       |                   | 3                  | -0.39 $\pm$ 0.18 | 30.5 $\pm$ 0.17                   | 0.69 $\pm$ 0.03                   | 0.06 $\pm$ 0.004                  | 52.0 $\pm$ 2.42                    | 1326 $\pm$ 75                     | 25.6 $\pm$ 1.5                 |                                  |                |
| Key West            |                   | 3                  | 0.16 $\pm$ 0.15  | 31.9 $\pm$ 0.76                   | 0.61 $\pm$ 0.05                   | 0.05 $\pm$ 0.005                  | 62.4 $\pm$ 6.83                    | 1784 $\pm$ 193                    | 28.7 $\pm$ 1.5                 |                                  |                |
| Looe Key            |                   | 84                 | 0.97 $\pm$ 0.15  | 28.0 $\pm$ 0.25                   | 1.30 $\pm$ 0.04                   | 0.13 $\pm$ 0.005                  | 28.2 $\pm$ 1.28                    | 679 $\pm$ 38                      | 24.5 $\pm$ 1.0                 |                                  |                |
| Miami               |                   | 3                  | 1.42 $\pm$ 0.19  | 23.3 $\pm$ 0.21                   | 1.82 $\pm$ 0.06                   | 0.15 $\pm$ 0.004                  | 15.0 $\pm$ 0.52                    | 393 $\pm$ 11                      | 26.3 $\pm$ 0.6                 |                                  |                |
| Munson Island       |                   | 16                 | 0.18 $\pm$ 0.20  | 28.0 $\pm$ 0.41                   | 1.01 $\pm$ 0.07                   | 0.08 $\pm$ 0.007                  | 35.7 $\pm$ 3.12                    | 1120 $\pm$ 189                    | 29.9 $\pm$ 2.5                 |                                  |                |
| New Smyrna Beach_GS |                   | 3                  | -0.56 $\pm$ 0.09 | 29.6 $\pm$ 0.11                   | 0.81 $\pm$ 0.04                   | 0.08 $\pm$ 0.001                  | 42.7 $\pm$ 2.13                    | 964 $\pm$ 21                      | 22.7 $\pm$ 0.7                 |                                  |                |
| Savannah_GS         |                   | 6                  | 2.50 $\pm$ 0.29  | 27.7 $\pm$ 0.49                   | 1.84 $\pm$ 0.06                   | 0.17 $\pm$ 0.008                  | 17.8 $\pm$ 0.87                    | 428 $\pm$ 26                      | 24.2 $\pm$ 0.9                 |                                  |                |
| Sebastian Inlet     | 6                 | 3.44 $\pm$ 0.23    | 30.5 $\pm$ 0.85  | 1.73 $\pm$ 0.11                   | 0.16 $\pm$ 0.006                  | 21.0 $\pm$ 1.49                   | 511 $\pm$ 33                       | 24.7 $\pm$ 1.5                    |                                |                                  |                |
| Western Caribbean   | W. Florida Bay    | 3                  | 3.23 $\pm$ 0.19  | 29.8 $\pm$ 0.65                   | 1.33 $\pm$ 0.06                   | 0.03 $\pm$ 0.001                  | 26.3 $\pm$ 1.41                    | 2337 $\pm$ 125                    | 89.4 $\pm$ 5.0                 |                                  |                |
|                     |                   | 10                 | -0.24 $\pm$ 0.30 | 31.5 $\pm$ 0.72                   | 0.83 $\pm$ 0.08                   | 0.06 $\pm$ 0.003                  | 53.5 $\pm$ 11.2                    | 1487 $\pm$ 126                    | 32.1 $\pm$ 2.9                 |                                  |                |
|                     | Belize            | 4                  | 0.78 $\pm$ 0.26  | 34.0 $\pm$ 0.36                   | 0.70 $\pm$ 0.17                   | 0.05 $\pm$ 0.004                  | 74.6 $\pm$ 25.8                    | 1876 $\pm$ 146                    | 32.5 $\pm$ 7.0                 |                                  |                |
|                     | Jamaica           | 6                  | -0.91 $\pm$ 0.13 | 29.9 $\pm$ 0.39                   | 0.91 $\pm$ 0.06                   | 0.06 $\pm$ 0.003                  | 39.5 $\pm$ 2.87                    | 1228 $\pm$ 72                     | 31.8 $\pm$ 2.3                 |                                  |                |
|                     |                   | 6                  |                  |                                   |                                   |                                   |                                    |                                   |                                |                                  |                |
| <b>Grand Total</b>  |                   |                    | <b>488</b>       | <b>1.55 <math>\pm</math> 0.11</b> | <b>28.0 <math>\pm</math> 0.15</b> | <b>1.18 <math>\pm</math> 0.02</b> | <b>0.11 <math>\pm</math> 0.003</b> | <b>32.7 <math>\pm</math> 0.71</b> | <b>853 <math>\pm</math> 23</b> | <b>26.6 <math>\pm</math> 0.5</b> |                |

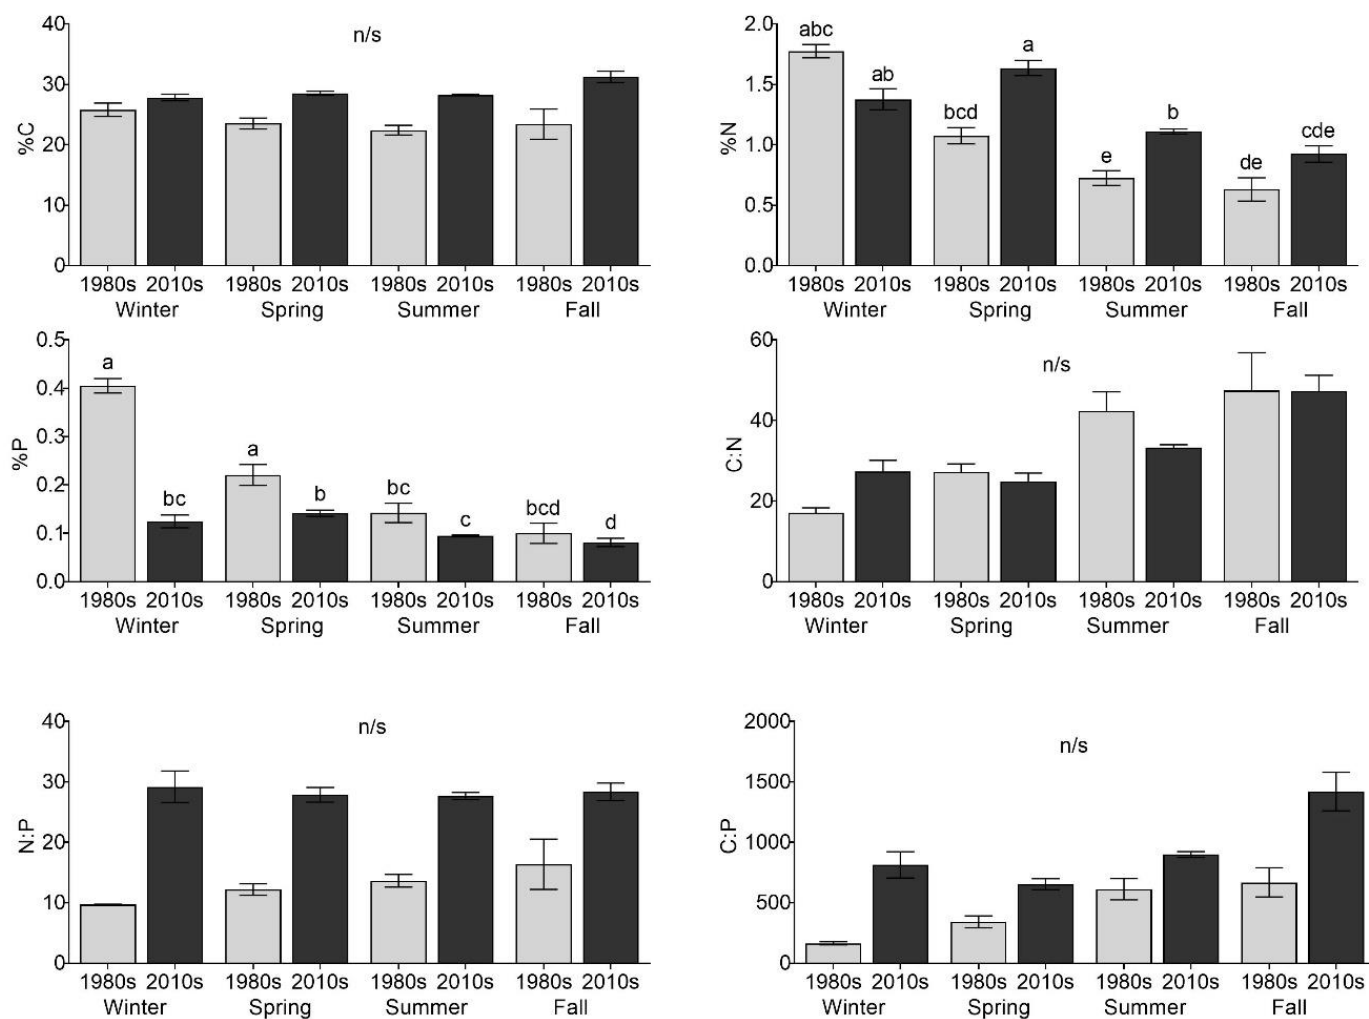

**Supplementary Fig. 1: *Sargassum* tissue nutrient contents by season and decade.**

Tissue elemental composition and stoichiometry (mean ± SE) of *Sargassum natans* and *S. fluitans* collected throughout the North Atlantic Ocean showing the interaction of decade and Northern Hemisphere meteorological season with different lowercase letters representing significant differences identified with Tukey HSD test; “n/s” denotes a non-significant ( $P > 0.05$ ) ANOVA result.

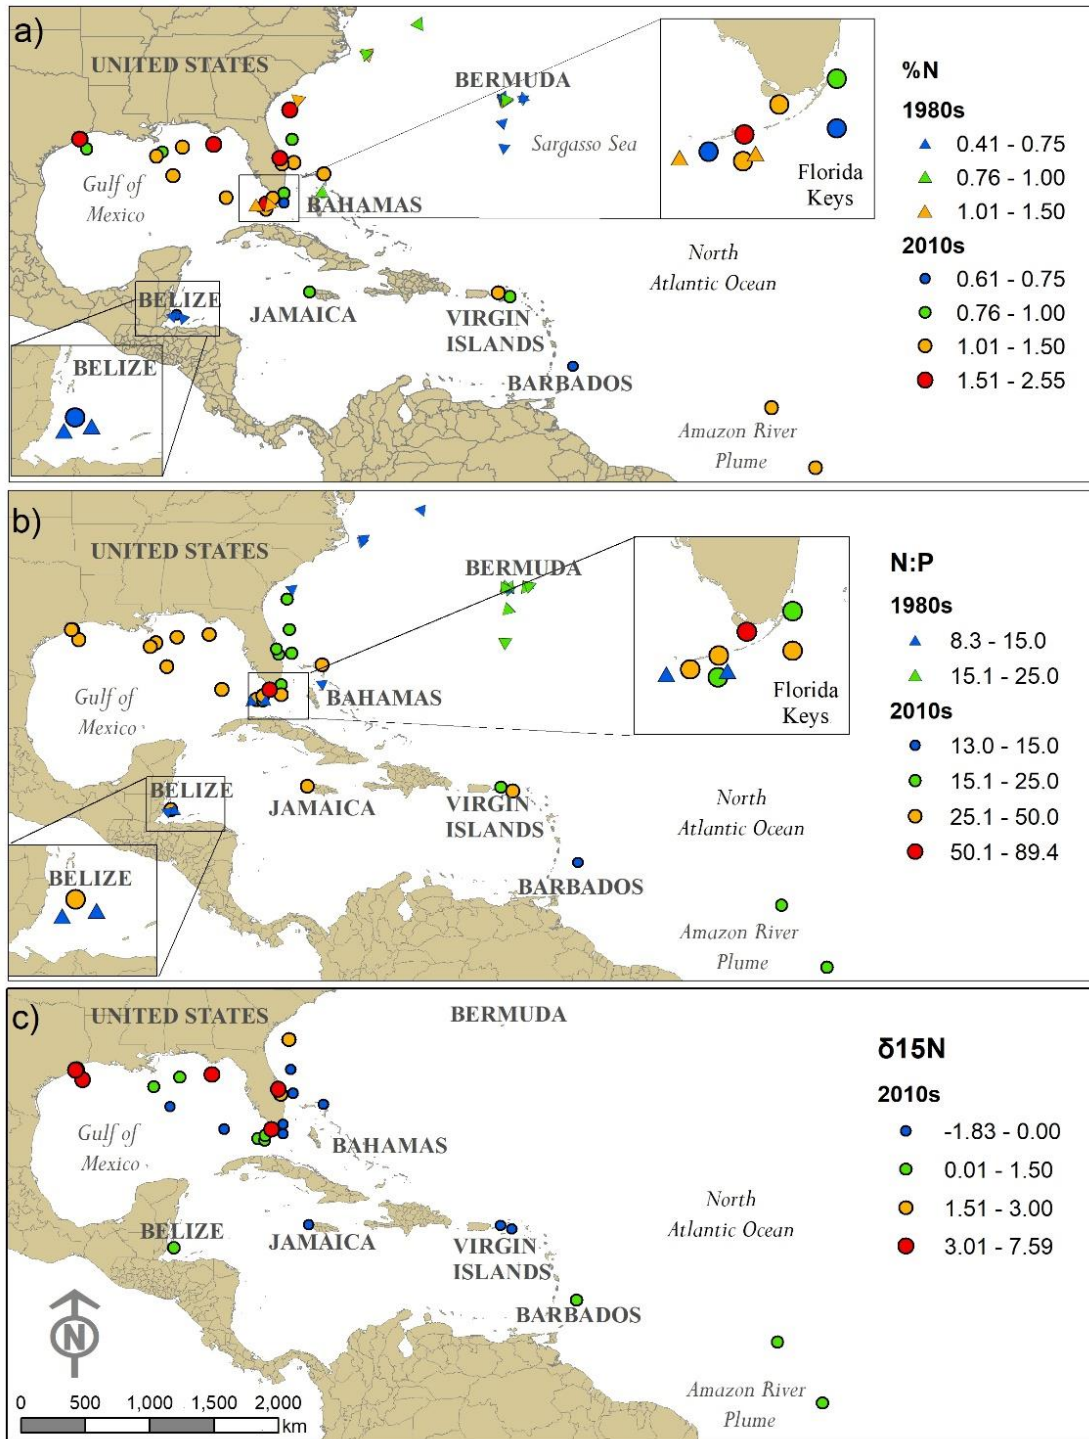

**Supplementary Fig. 2: *Sargassum* nutrient contents by location and decade.** *Sargassum* tissue nutrient contents by location and decade (showing location means). a) For %N, values have significantly increased from the 1980s (decadal mean = 0.89%) to post-2010 (decadal mean = 1.21%); > 1.5% N (red circles) are considered non-limiting to growth<sup>1</sup>. N:P ratios have significantly (111%; ANOVA,  $F = 1\,93.4$ ,  $P < 0.001$ ) increased from the 1980s (decadal mean = 13.2) to post-2010 (27.8). Enriched  $\delta^{15}\text{N}$  values (red circles; >3‰) are indicative of urbanized wastewater discharges; while more depleted values (blue, green, and orange circles) are indicative of  $\text{N}_2$  fixation, atmospheric deposition, and upwelling.

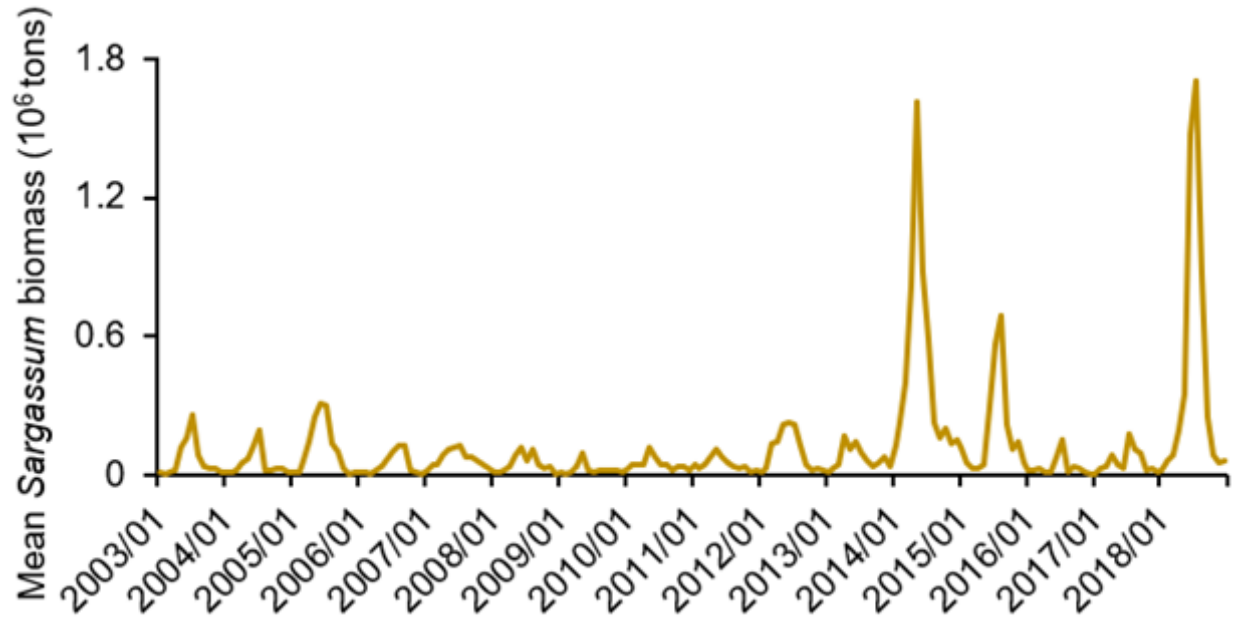

**Supplementary Fig. 3: *Sargassum* monthly biomass.** Monthly mean *Sargassum* wet biomass in the GOM (18°N – 32°N, 98°W – 80°W), determined from satellite measurements <sup>2,3</sup>.

## References

1. Fujita, R., Wheeler, P. & Edwards, R. Assessment of macroalgal nitrogen limitation in a seasonal upwelling region. *Mar. Ecol. Prog. Ser.* **53**, 293-303 (1989).
2. Wang, M. *et al.* Remote Sensing of Sargassum Biomass, Nutrients, and Pigments. *Geophys. Res. Lett.* **45**, 12,359-312,367 (2018).
3. Wang, M. *et al.* The great Atlantic *Sargassum* belt. *Science* **364**, 83-87 (2019).
